# Supplementary material for: Reefal ostracod assemblages from the Zanzibar Archipelago (Tanzania)
Source: Copernicus journal article supplement (doi:10.5194/egusphere-2024-487), 2024-03-13
Supplement: Supplementary file 1 [file egusphere-2024-487-supplement.zip]

Archive with 2 entries (2 files):
- egusphere-2024-487 supplementary data.xlsx
- egusphere-2024-487-supplement-version1.pdf
