# Supplementary material for: Reefal ostracod assemblages from the Zanzibar Archipelago (Tanzania)
Source: Copernicus journal article supplement (doi:10.5194/egusphere-2024-487), 2024-03-13
Supplement: Supplementary file 1 [file egusphere-2024-487-supplement.zip › egusphere-2024-487 supplementary data.xlsx]

## Sheet: Sheet1
Sample	Depth(m)	Island	location	Longitude	Latitude	Habitat	Actinocythereis duplex	Adencythere kodalnamerensis	Adencythere spp	Aglaiocypris complanata	Aglaiocypris? sp. 1	Aglaiocypris sp. 2	Aglaiocypris spp	Alatahermanites hastatus	Ambostracon sp. 1	Ambostracon sp. 2	Aponesidea sp. 1	Aponesidea sp. 2	Aponesidea sp. 3	Anchistrocheles?	Auradilus splendideornatus	Aversovalva sp. 1	Baltraella sp. 1	Bradyon stellatum	Bosasella dubia	Bosasella elongata	Bosasella gigas	Bosasella profunda	Bosasella sp. 1	Bosasella sp. 2	Bosasella sp. 3	Bosasella spp	Perissocytheridea? sp. 2	Bythoceratina mandviensis	Bythoceratina (Bythocythere?) sp. 1	Bythoceratina (Eucytherura?) sp. 2	Bythoceratina sp. 3	Bythoceratina spp	Bythocypris reniformis	Bythocypris sp. 1	Callistocythere arcana	Callistocythere cookei	Callistocythere sp. 1	Callistocythere sp. 2	Callistocythere sp. 3	Callistocythere sp. 4	Callistocythere sp. 5	Caudites cf. C. knysnaensis	Caudites exmouthensis
Haramu Passage 20	20	Pemba	Haramu Passage	39.628	-5.0946	fore reef	0	0	0	0	0	0	0	0	0	0	0	1	0	0	0	0	0	0	0	3	0	4	0	0	2	0	0	0	0	0	0	0	0	0	0	0	0	0	0	0	0	0	0
Haramu Passage 30	30	Pemba	Haramu Passage	39.628	-5.0946	fore reef	0	0	0	0	0	0	0	0	0	0	0	0	0	0	2	0	0	0	0	2	0	6	0	0	0	0	0	1	0	0	0	0	0	0	0	0	0	0	0	0	0	2	0
Kokota reef 25	25	Pemba	Kokota reef	39.6472	-5.13105	fringing reef	0	0	0	0	0	0	0	0	0	0	2	2	0	0	1	0	0	0	0	5	0	9	7	2	1	0	0	3	0	0	0	0	0	0	0	0	2	0	0	0	0	1	0
Kotota reef 16	16	Pemba	Kokota reef	39.6471	-5.13105	fringing reef	0	0	0	0	0	0	0	1	0	0	3	1	0	0	0	0	0	0	0	2	0	30	4	3	0	0	0	0	0	0	0	0	0	0	1	0	2	0	0	0	0	4	0
Mapenduzi wall 40	40	Pemba	Mapenduzi wall	39.6026	-5.23339	fore reef	0	0	0	0	0	0	0	0	0	0	1	4	1	0	0	0	0	0	0	6	0	19	1	1	0	0	0	3	0	0	0	0	1	0	0	0	3	0	0	0	0	1	0
Mapenduzi wall 42	42	Pemba	Mapenduzi wall	39.6026	-5.23339	fore reef	0	0	0	0	0	0	0	0	0	0	0	1	0	0	1	0	0	0	0	5	0	14	6	0	0	0	0	1	0	0	0	1	0	0	0	0	0	0	0	0	0	0	1
Misali island 20	20	Pemba	Misali island	39.5918	-5.24563	fore reef	0	0	0	0	0	0	0	0	0	0	0	0	0	0	1	0	0	2	0	2	0	31	6	2	0	0	0	0	0	0	0	0	0	0	0	0	0	0	0	0	0	2	0
RusNungwi peak 12	12	Zanzibar	RusNungwi peak	39.3192	-5.7225	fringing reef	0	11	1	1	1	0	0	0	0	0	0	1	0	0	6	0	0	0	0	2	2	0	15	0	0	0	6	0	0	0	0	0	0	0	0	4	0	0	0	0	4	1	0
RusNungwi peak 12-14	12-14	Zanzibar	RusNungwi peak	39.3192	-5.7225	fringing reef	0	0	0	0	0	0	0	0	0	0	0	1	0	0	3	0	0	0	0	1	0	1	24	0	0	0	4	1	0	0	0	0	0	0	0	2	0	0	0	0	1	0	1
RusNungwi peak 20	20	Zanzibar	RusNungwi peak	39.3192	-5.7225	fringing reef	0	3	0	0	1	0	1	0	0	0	0	3	0	0	2	0	1	1	0	2	2	2	5	0	0	0	6	5	0	0	0	0	0	0	1	2	1	0	0	0	3	0	1
RusNungwi 16	16	Zanzibar	RusNungwi	39.3425	-5.74806	fringing reef	1	10	0	0	1	0	1	1	0	0	0	2	0	0	5	0	0	0	0	6	3	1	12	0	0	3	8	2	0	0	0	0	2	0	0	3	1	0	0	1	3	1	8
RusNungwi 20	20	Zanzibar	RusNungwi	39.3425	-5.74806	fringing reef	0	0	0	0	0	0	0	0	0	0	0	0	0	0	1	0	0	0	0	1	0	0	0	0	0	0	3	0	0	0	0	0	0	0	0	3	1	0	0	0	1	0	0
Mnemba atoll 30	30	Zanzibar	Mnemba atoll	39.3939	-5.84889	sand flat	0	0	0	0	0	0	0	0	0	0	0	1	0	0	0	0	0	0	0	0	0	0	0	0	0	0	0	0	0	0	0	0	0	1	0	0	0	0	0	0	0	2	7
Ocean paradise 3	3	Zanzibar	Ocean paradise	39.3642	-5.91833	back reef	2	3	0	0	4	0	1	0	0	0	0	0	0	0	5	0	0	0	1	0	1	3	0	0	0	2	2	0	0	0	0	0	0	0	2	5	0	2	0	1	4	1	0
Bawe island 9-30	9-30	Zanzibar	Bawe island	39.1408	-6.135	fringing reef	2	3	0	0	0	0	0	0	14	0	0	0	0	0	7	0	0	13	0	2	12	11	5	0	1	0	14	1	0	0	0	0	0	0	5	6	2	1	4	0	0	3	0
Bawe island grob	9-30	Zanzibar	Bawe island	39.1408	-6.135	fringing reef	2	1	0	0	0	0	0	0	5	0	0	0	0	0	3	0	0	10	0	0	14	28	2	0	1	0	9	0	0	0	0	0	0	0	5	4	0	1	0	0	0	1	0
Stone town 12	12	Zanzibar	Stone town	39.1474	-6.21368	fringing reef	11	1	0	13	0	0	1	0	6	0	0	0	0	0	1	0	0	5	0	0	1	5	3	0	0	0	8	19	1	0	0	0	0	0	20	1	2	0	0	0	0	2	0
Stone town 20	20	Zanzibar	Stone town	39.1474	-6.21368	fringing reef	6	2	0	0	0	0	0	0	2	0	0	3	0	0	0	0	0	11	0	0	13	13	2	0	1	0	14	2	0	0	0	0	0	0	17	2	1	0	0	0	0	0	0
Menai bay 1	1	Zanzibar	Menai bay	39.3719	-6.32361	mangrove	0	1	0	0	2	0	1	0	0	10	0	0	0	0	1	0	0	0	0	0	0	0	0	0	0	0	0	0	1	0	0	0	0	0	5	0	0	1	0	2	5	4	0
Kizimkazi beach low tide 10	10	Zanzibar	Kizimkazi beach	39.46	-6.43806	sand flat	0	1	0	0	0	0	0	0	0	0	0	0	0	0	0	0	0	0	0	4	0	0	0	0	0	0	1	0	0	0	0	0	0	0	0	1	0	0	0	0	0	1	2
Mafia outside chole 21	21	Mafia	Mafia outside	39.828	-7.91794	fore reef	0	0	0	0	0	0	0	0	0	1	0	2	0	0	0	0	0	0	0	1	1	1	2	0	0	0	2	1	0	0	0	0	0	0	0	0	0	0	0	0	0	1	3
Mafia outside chole 20	20	Mafia	Mafia outside	39.8224	-7.92208	fore reef	0	0	0	0	0	0	0	0	0	1	1	2	0	0	2	0	0	0	2	10	5	1	6	0	0	1	2	3	0	1	1	0	0	0	0	0	1	0	0	0	0	4	13
Chole bay 18-21	18-21	Mafia	Chole bay1	39.8173	-7.94144	back reef	0	0	0	0	0	0	0	0	0	0	0	1	0	0	1	0	0	0	0	2	0	1	4	0	0	0	0	0	0	0	0	0	0	0	0	0	0	0	0	0	0	0	2
Chole bay 15-18	15-18	Mafia	Chole bay2	39.7871	-7.94828	fringing reef	0	1	0	0	0	0	1	0	0	0	1	1	0	1	0	1	0	0	6	7	2	2	5	0	0	0	2	0	0	0	1	0	0	0	0	2	0	0	0	0	0	2	9
Chole bay 20	20	Mafia	Chole bay2	39.786	-7.94911	fringing reef	0	2	0	0	0	1	0	0	0	0	1	2	0	0	0	0	0	0	5	0	1	7	7	0	0	0	0	0	0	0	0	0	1	1	0	1	0	0	0	0	0	4	17
Mafia lodge 0-3	0-3	Mafia	Mafia lodge	39.7479	-7.97339	fringing reef	0	0	0	0	0	5	0	0	0	3	0	0	0	0	11	0	0	0	0	1	2	0	1	0	0	0	3	0	0	0	0	0	0	0	10	4	0	0	0	0	1	7	0
[truncated: 192 more columns]
