# Supplementary material for: Reefal ostracod assemblages from the Zanzibar Archipelago (Tanzania)
Source: Copernicus journal article supplement (doi:10.5194/egusphere-2024-487), 2024-03-13
Supplement: Supplementary file 1 [file egusphere-2024-487-supplement.zip › egusphere-2024-487-supplement-version1.pdf]

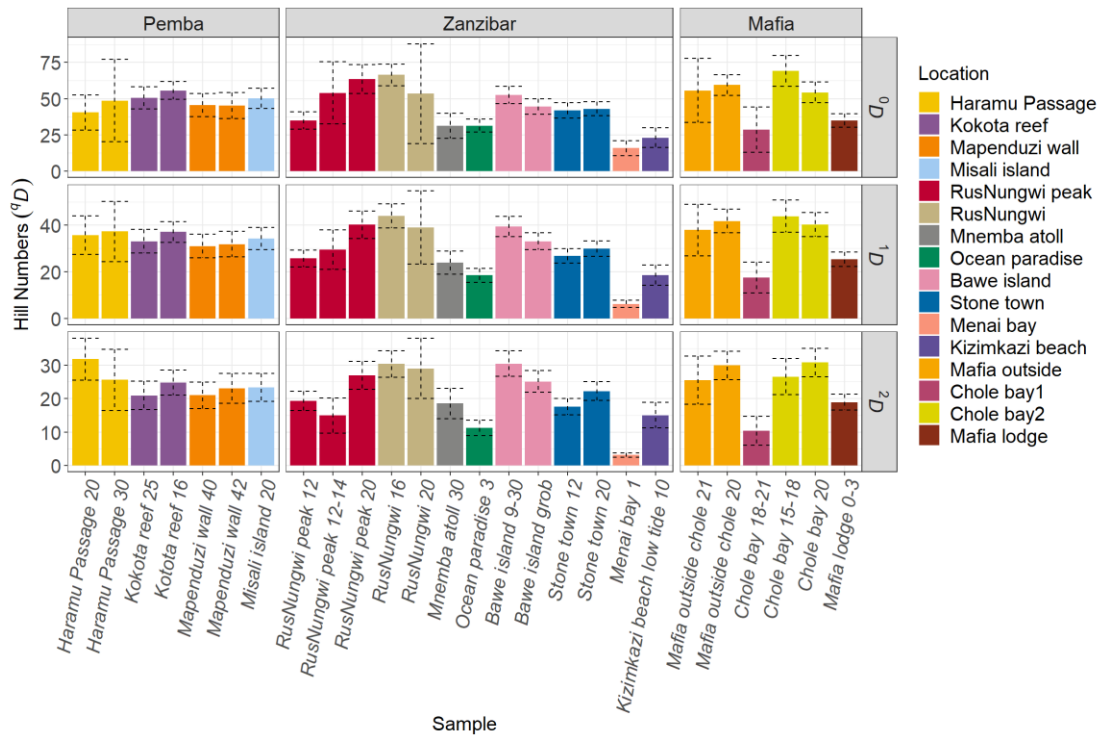

Fig. S1. Alpha diversity of each sample shown by Hill numbers  $^0D$ ,  $^1D$  and  $^2D$  based on 82.5% sample coverage. Color scheme shows location.

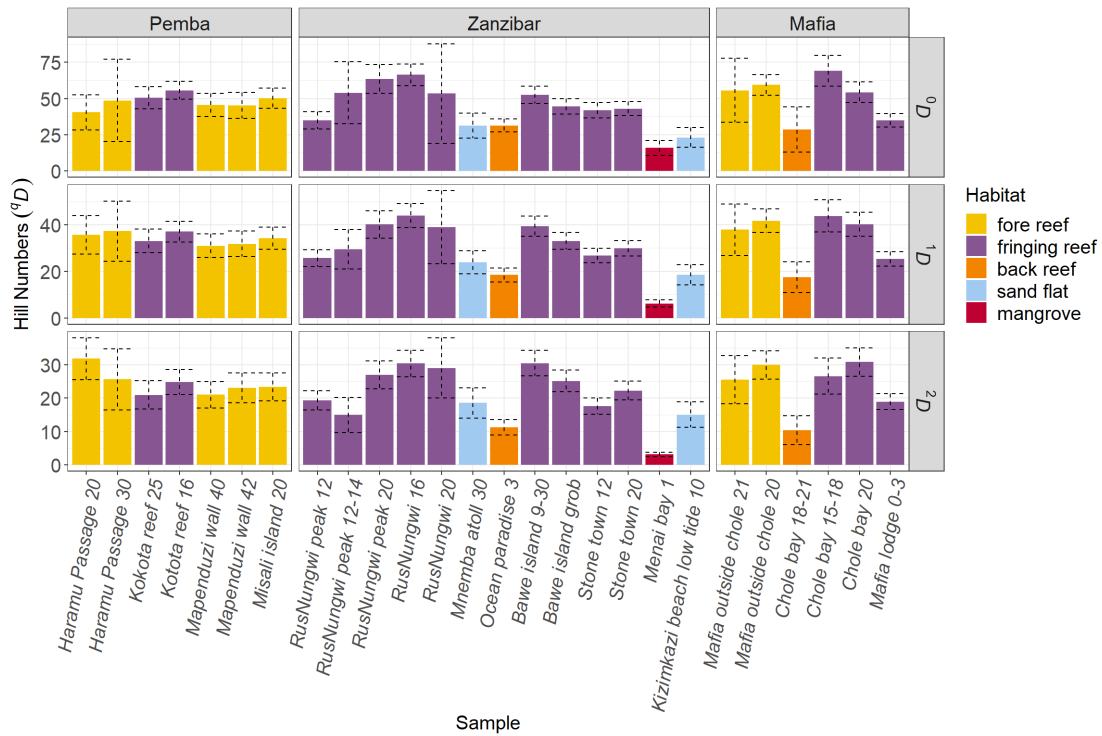

Fig. S2. Alpha diversity of each sample shown by Hill numbers  $^0D$ ,  $^1D$  and  $^2D$  based on 82.5% sample coverage. Color scheme shows habitat type.

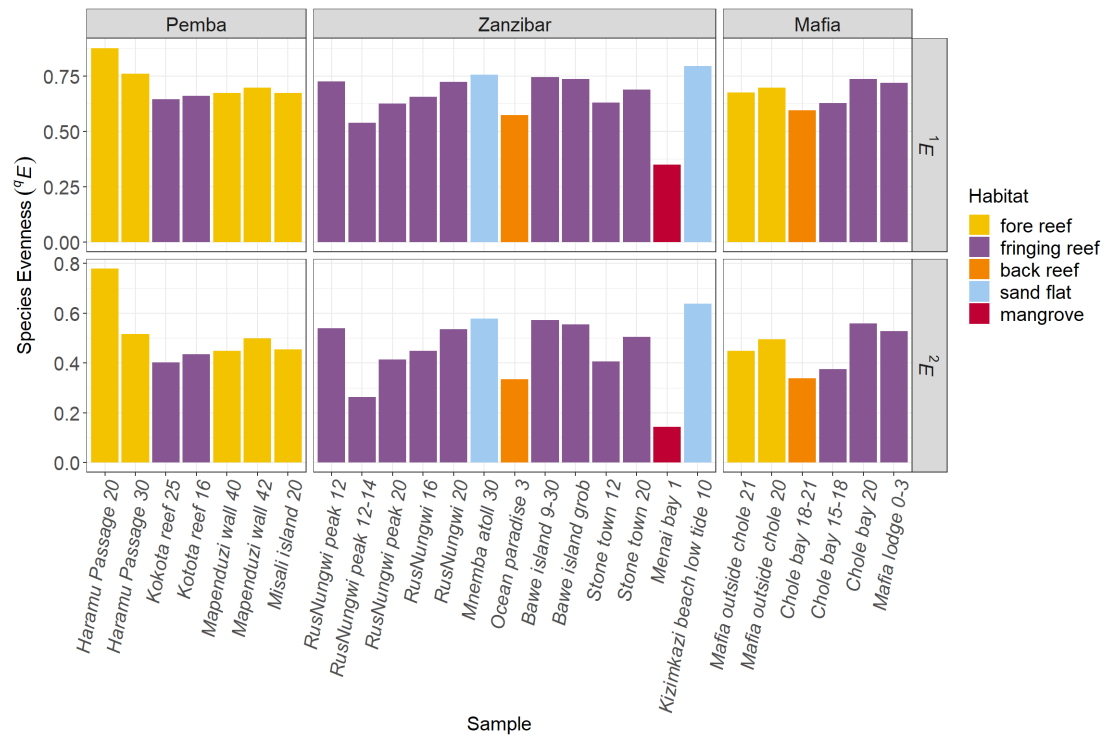

Fig. S3. Evenness as the normalized slope of Hill number profile for order  $q=1$  (top) and order  $q=2$  (bottom) based on 82.5% sample coverage. Color scheme shows habitat type.

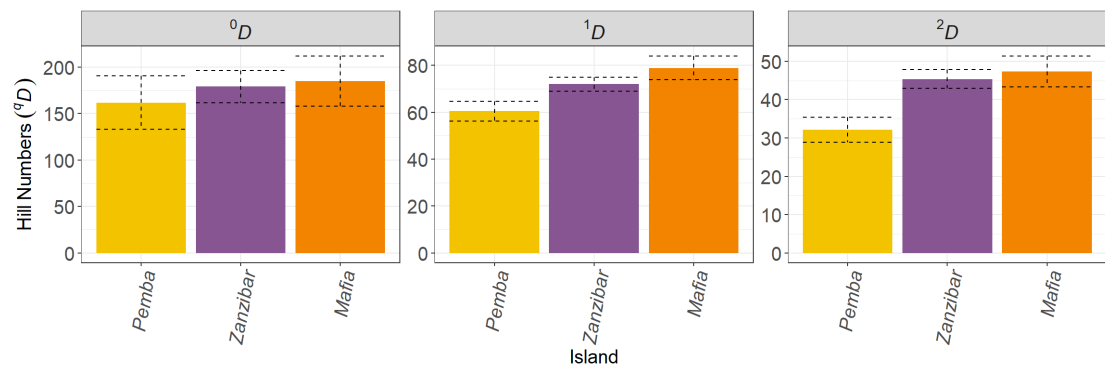

Fig. S4. Gamma diversity of each island shown by Hill numbers  $D_0$ ,  $D_1$  and  $D_2$  based on 98.6% sample coverage.

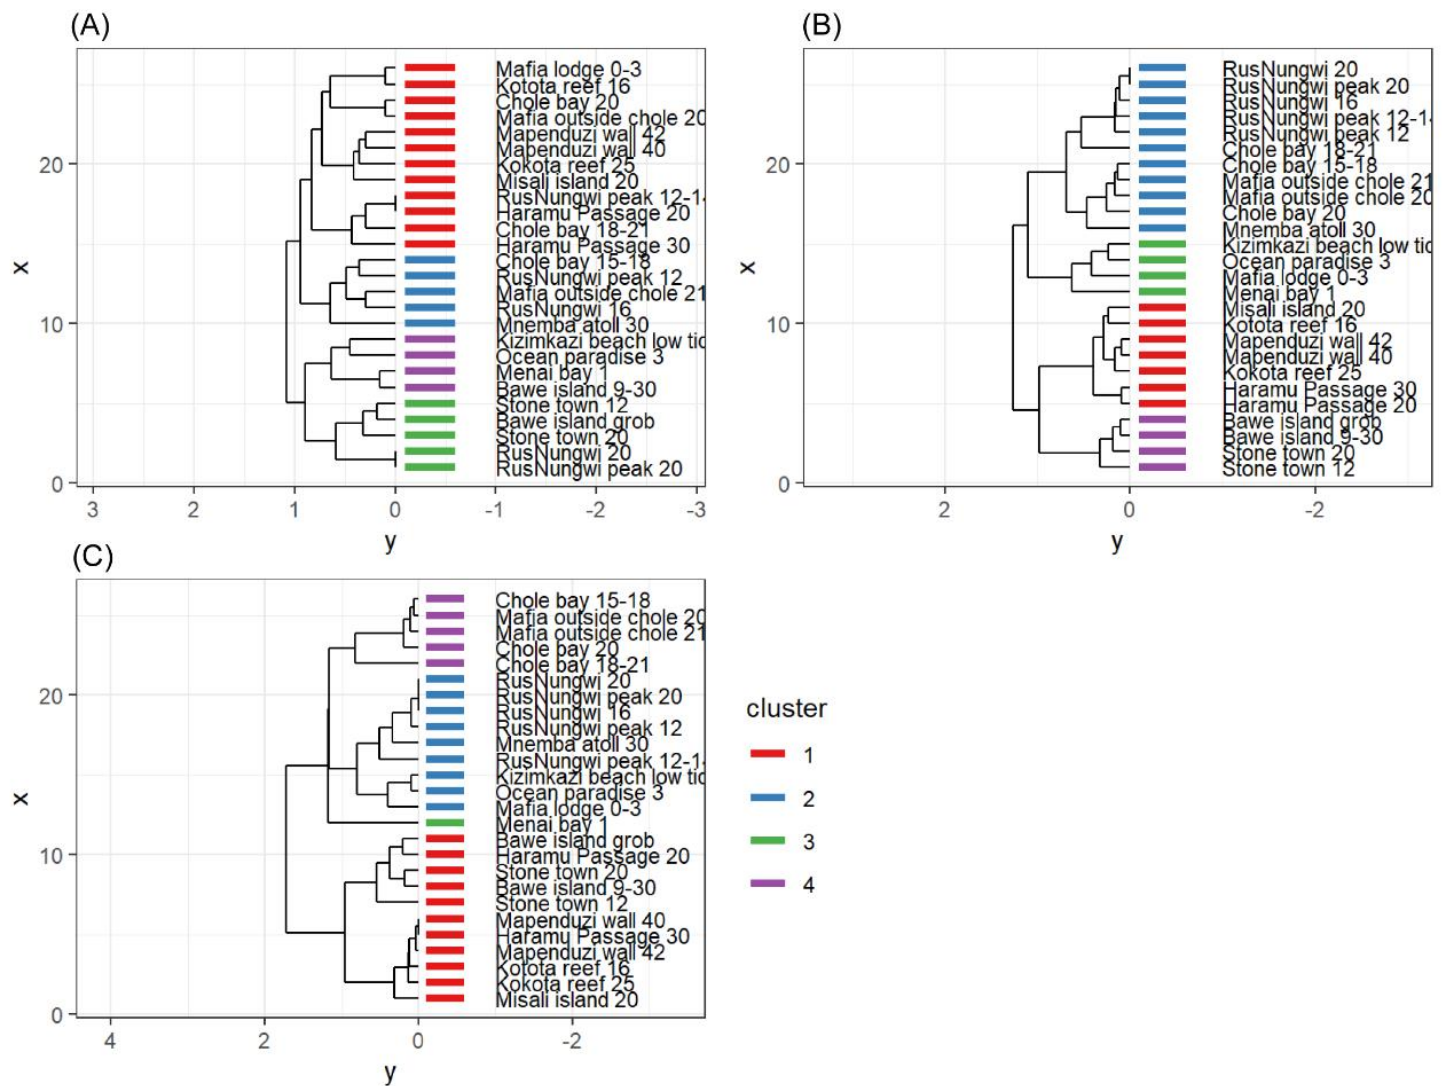

Fig. S5. Ward's minimum variance cluster dendrograms showing the separation of four biofacies based on (A) Sørensen, (B) Horn, and (C) Morisita-Horn dissimilarities. Note that the color schemes are independent among panels; thus, the biofacies based on different dissimilarities are not necessarily related.
